# Supplementary material
Source: PubMed Central journal article supplement (PMC3742382)
Supplement: NIHMS432273-supplement-1.pdf [file NIHMS432273-supplement-1.pdf]

## Supplementary Figure

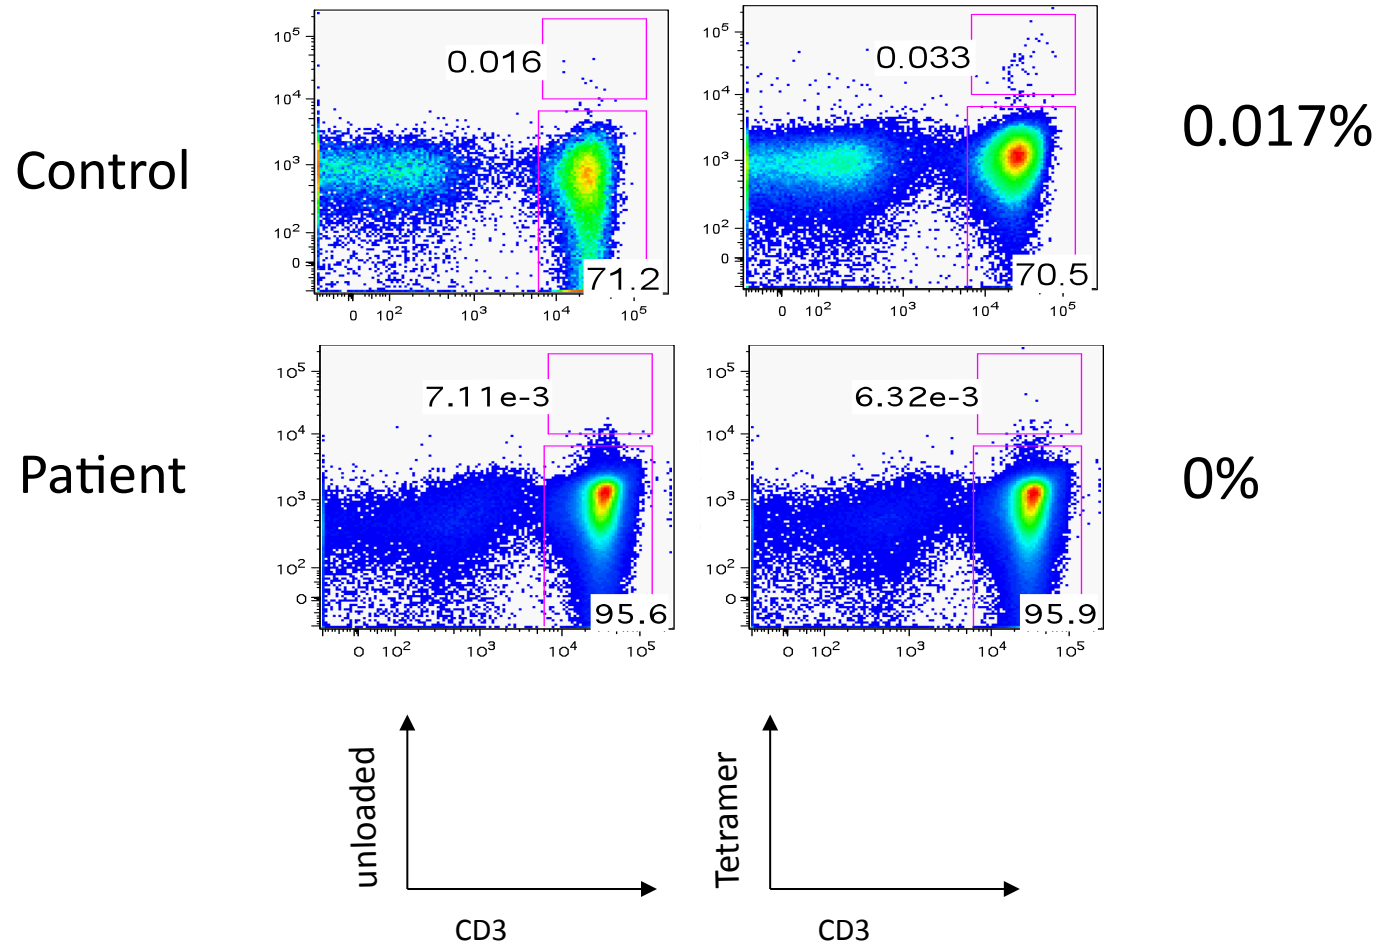

### Supplementary Figure:

To detect peripheral blood NKT cells, CD1d tetramers were loaded with PBS57. Unloaded CD1d tetramers were used as a negative control. The difference of PBS57-loaded minus unloaded tetramer positive CD3<sup>+</sup> T cells indicates percentage of NKT cells among CD45<sup>+</sup> hematopoietic cells.
